# Supplementary material for: Hierarchical bioglass scaffolds: introducing the “milky way” for templated bioceramics
Source: Royal Society of Chemistry journal article supplement (doi:10.1039/c5tb00138b), 2015-01-01
Supplement: c5tb00138b1.pdf [file c5tb00138b1.pdf]

## Supporting Information

### Hierarchical bioglass scaffolds: introducing the “milky way” for templated biomaterials

Diego Onna, Yanina Minaberry and Matías Jobbágy\*

<sup>a</sup> CONICET-INQUIMAE, Facultad de Ciencias Exactas y Naturales, Universidad de Buenos Aires, Pabellón II, Ciudad Universitaria, C1428EHA-Buenos Aires, Argentina

Corresponding author: [jobbag@qi.fcen.uba.ar](mailto:jobbag@qi.fcen.uba.ar)

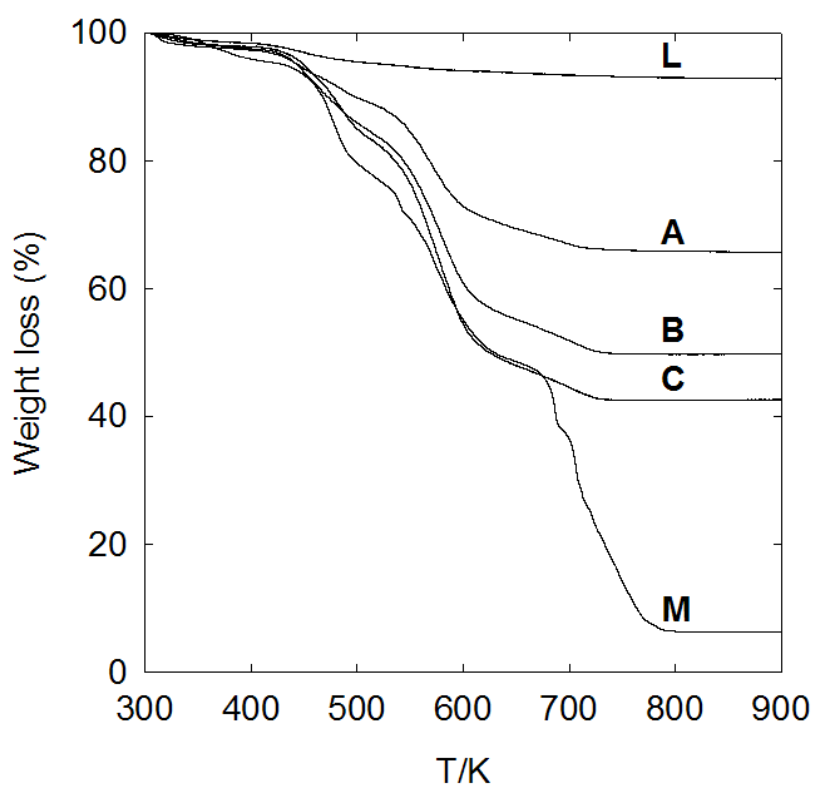

**Figure S1.** TGA trace (air atmosphere) of bare Ludox® (L), Milk (M) and sample ML05 prepared with 19 (A), 37 (B) and 56 (C) mL of milk.

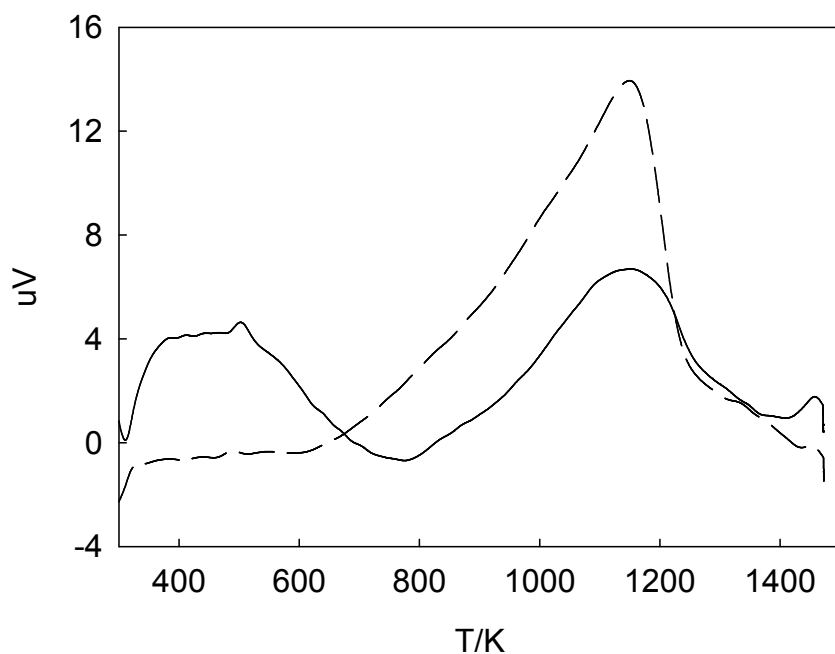

**Figure S2.** DTA trace (air atmosphere) of bare Ludox (full line) and sample ML05 annealed for 5 h at 773 K (dashed line).

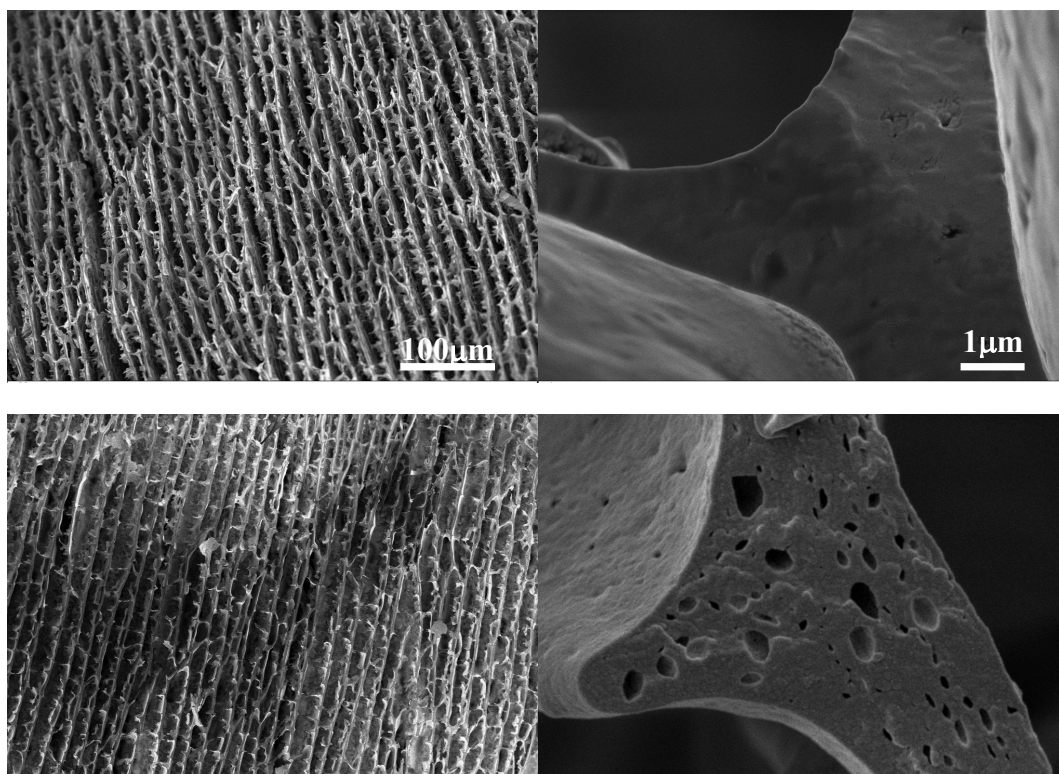

**Figure S3.** FESEM images of cross-sectioned (perpendicular to the direction of freezing) sample ML10 before (upper row) and after (lower row) 5 h annealing at 973 K under air atmosphere.

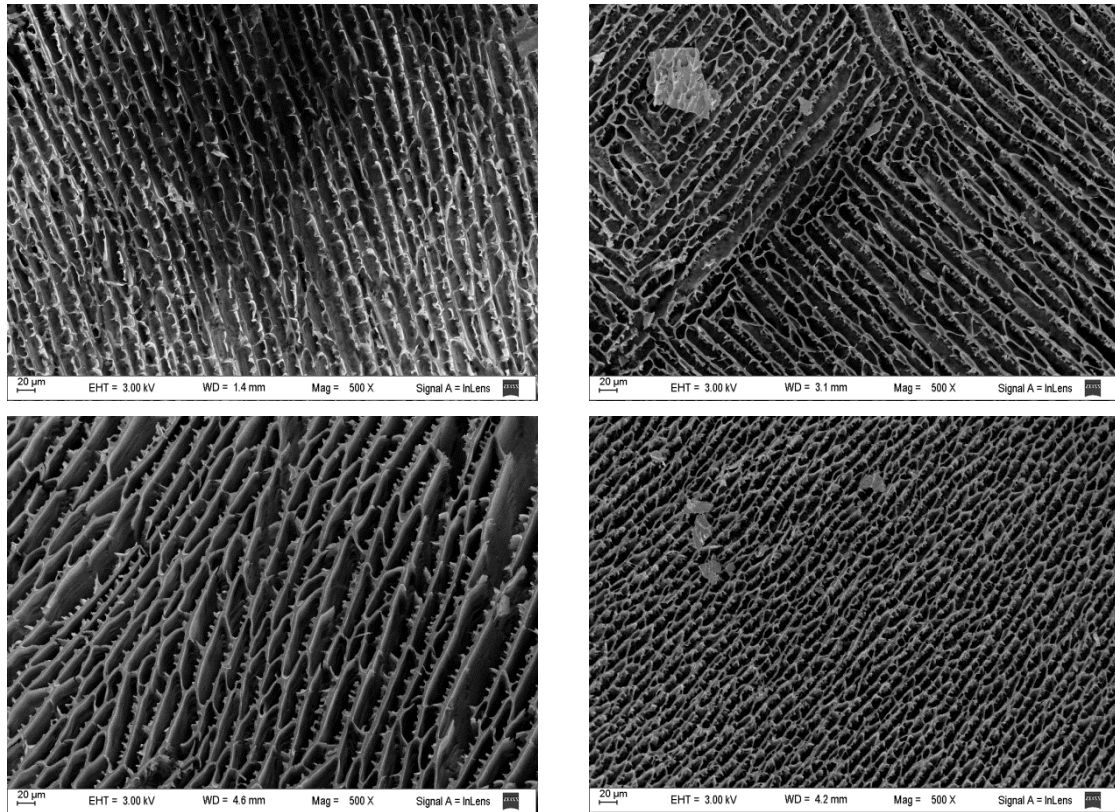

**Figure S4.** FESEM images of cross-sectioned (perpendicular to the direction of freezing) sample ML10 (upper row) and ML14 (lower row) frozen at 2 mm min<sup>-1</sup> (left column) or 4 mm min<sup>-1</sup> (right column).

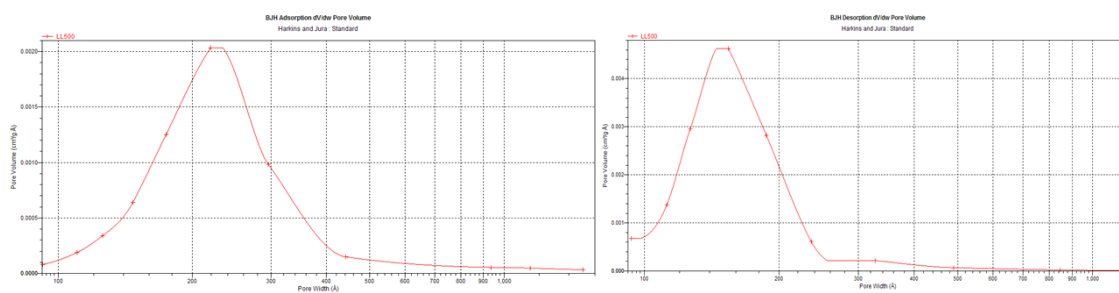

**Figure S5.** Pore distribution (BJH) from N<sub>2</sub> adsorption-desorption isotherm (77 K) (adsorption, left; desorption, right) of sample ML10 annealed 5 h at 773 K.

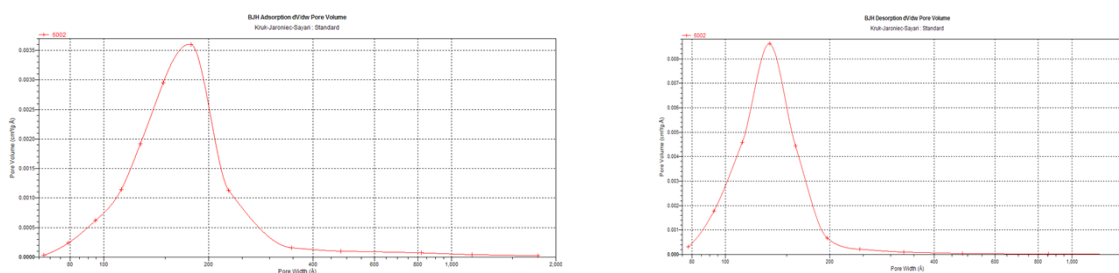

**Figure S6.** Pore distribution (BJH) from N<sub>2</sub> adsorption-desorption isotherm (77 K) (adsorption, left; desorption, right) of sample ML10 annealed 5 h at 873 K.

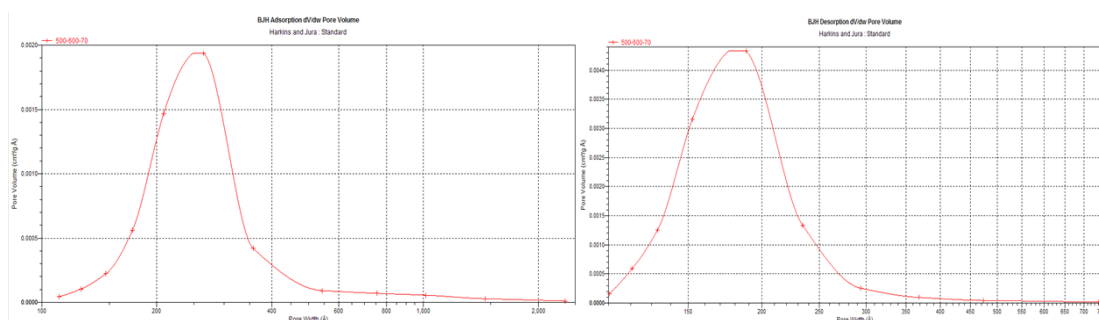

**Figure S7.** Pore distribution (BJH) from N<sub>2</sub> adsorption-desorption isotherm (77 K) (adsorption, left; desorption, right) of sample ML10 annealed 5 h at 973 K.

**Table S1.** Atomic percentage estimated from EDS probe for sample ML10 immersed in SBF at 37 °C for increasing times.

| Exposure time/h | Si   | P   | Ca   | Na  |
|-----------------|------|-----|------|-----|
| 0               | 94,8 | 1,5 | 2,6  | 1,1 |
| 4               | 96,6 | 1,1 | 0,9  | 1,4 |
| 24              | 75,9 | 9,4 | 12,7 | 1,9 |

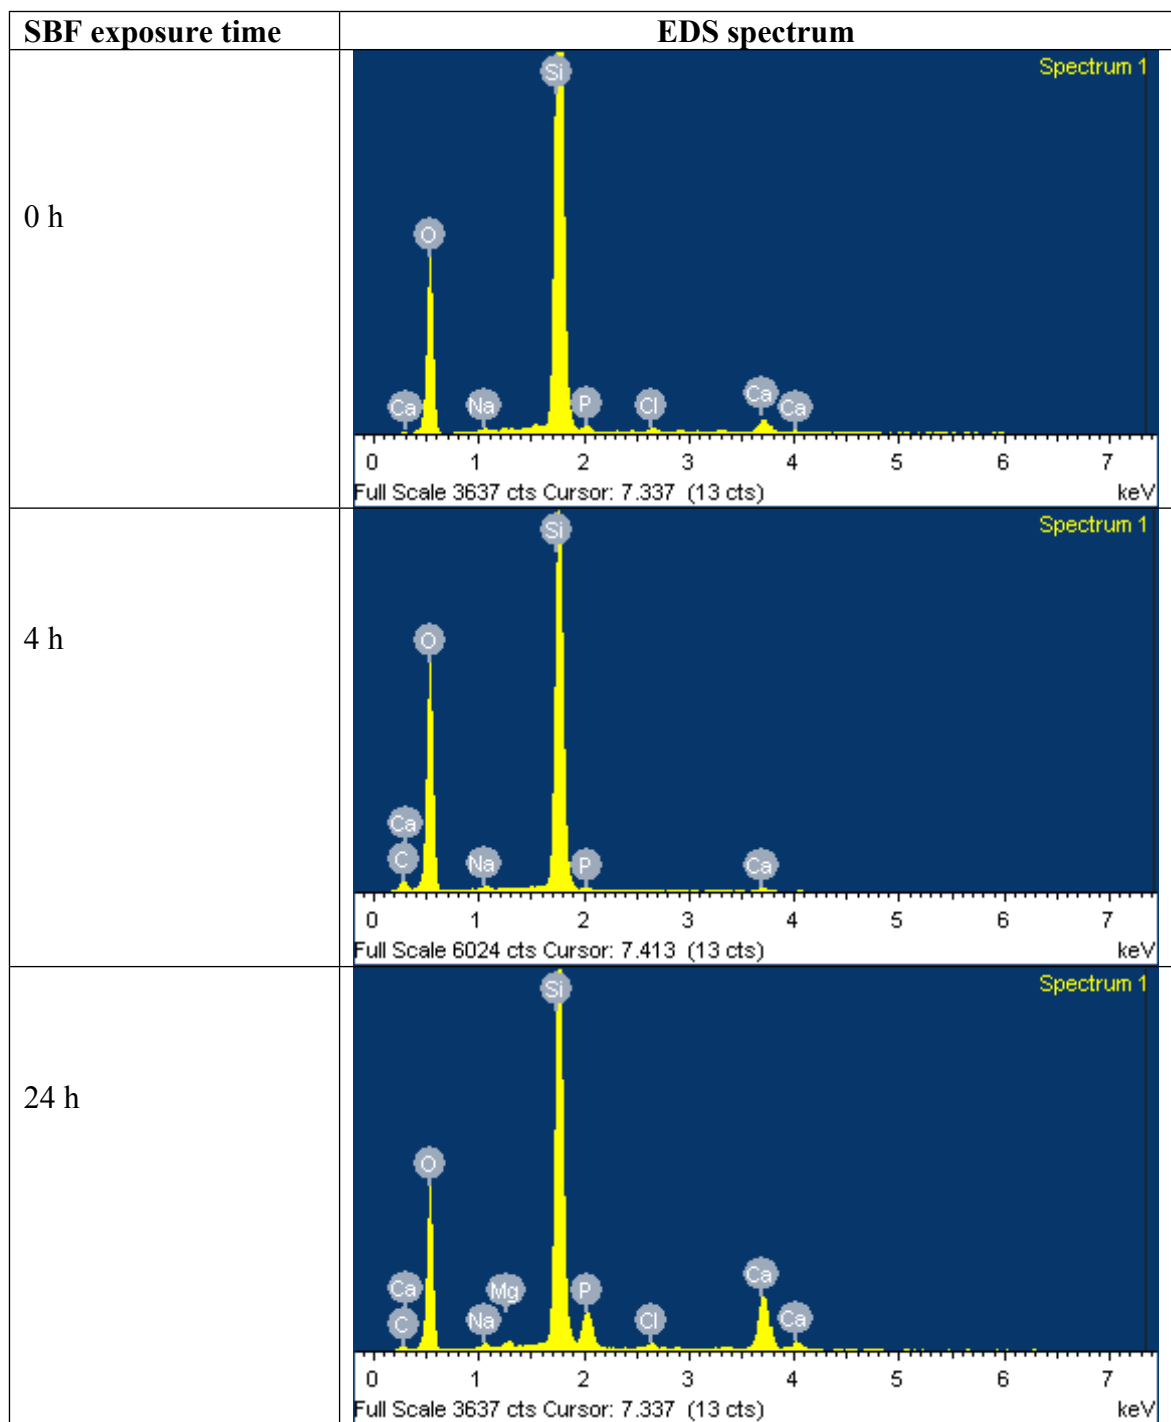

**Figure S8.** EDS spectra of sample ML exposed at 37 °C to SBF for increasing periods.
